# Supplementary material for: Heterocyclic thiosemicarbazones as fluorescent sensors for the selective recognition of cations in the aqueous phase
Source: Royal Society of Chemistry journal article supplement (doi:10.1039/c3ay40381e), 2013-01-01
Supplement: c3ay40381e.pdf [file c3ay40381e.pdf]

Supporting Information

**Heterocyclic Thiosemicarbazones as Fluorescent Sensor for the Selective Recognition of Cations in Aqueous Phase**

**Sivalingam Suganya, Duraisamy Udhayakumari, Sivan Velmathi\***

Received (in XXX, XXX) Xth XXXXXXXXXX 20XX, Accepted Xth XXXXXXXXXX 20XX

DOI: 10.1039/b000000x.

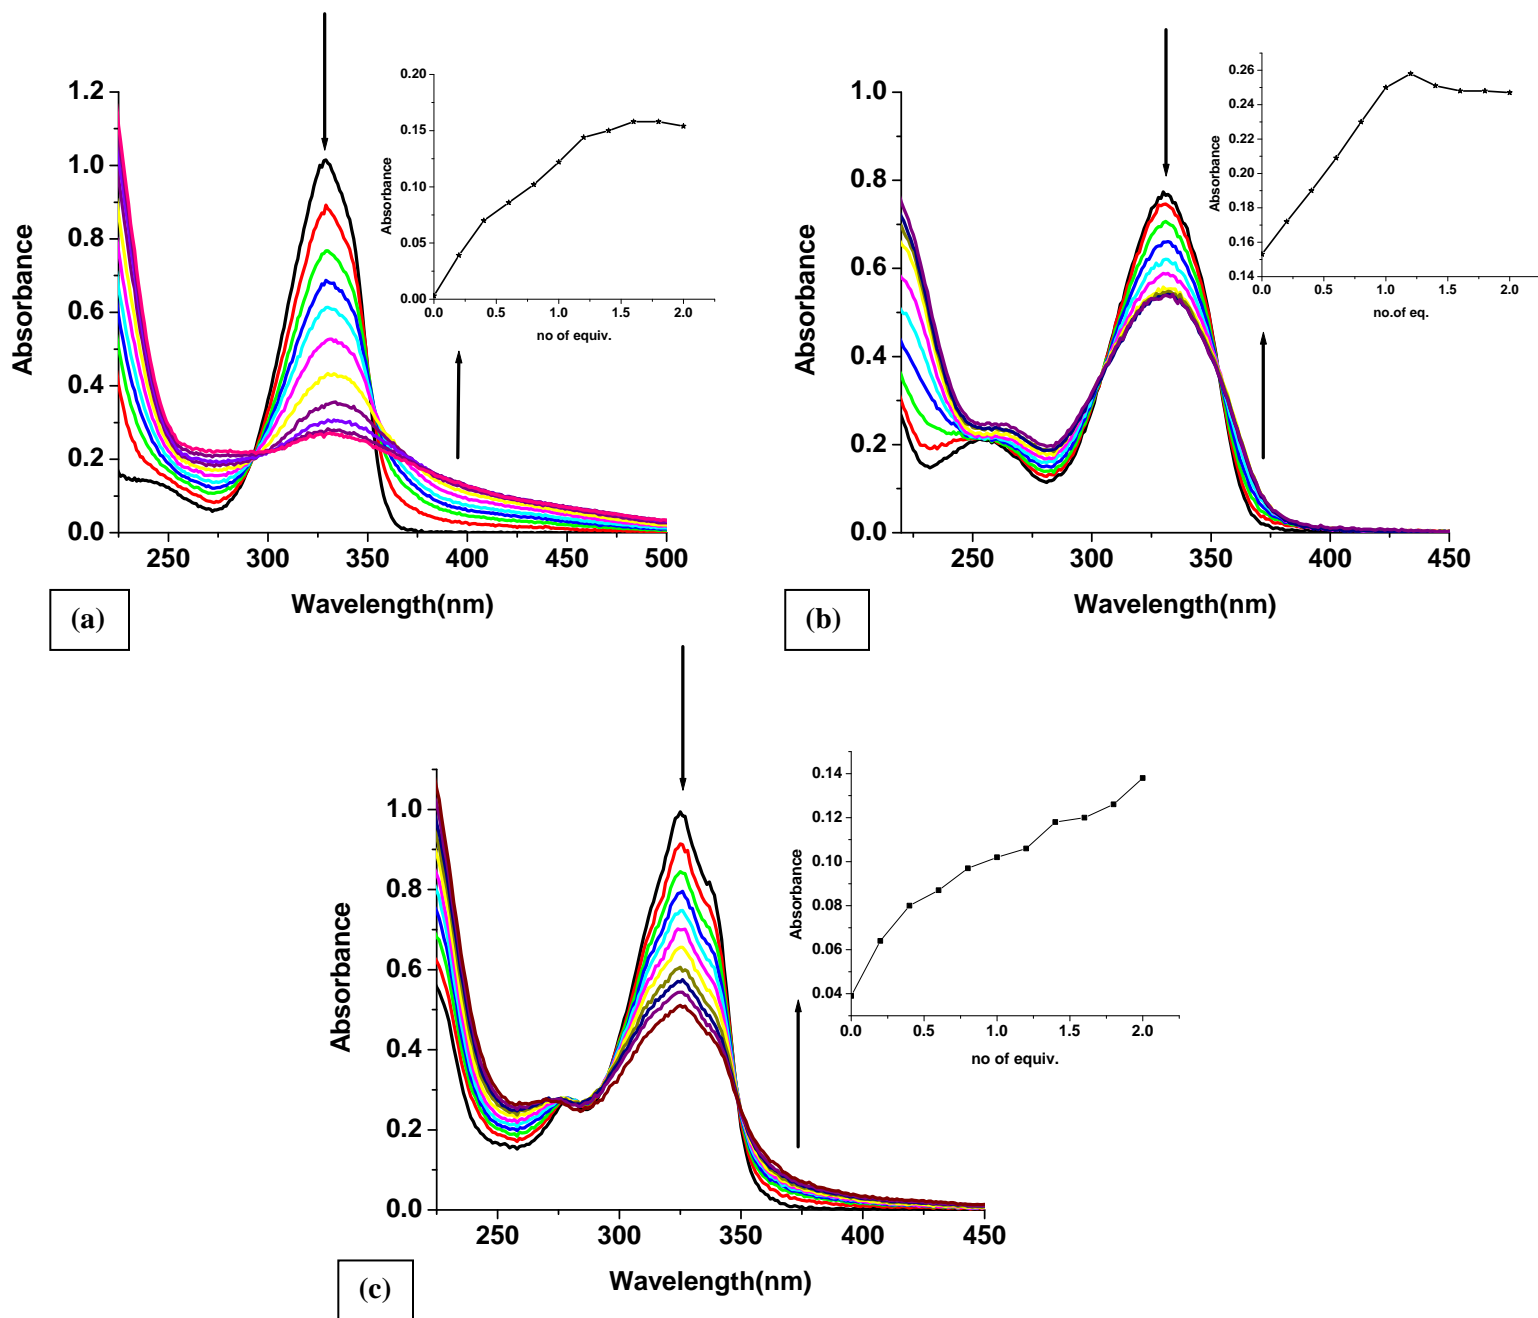

Fig. S1 UV-vis spectra of receptors (a) 1, (b) 2, (c) 3 ( $2.5 \times 10^{-5}$  M in DMSO) with the addition of 0- 2 equiv. of  $\text{Cu}^{2+}$  ion ( $1.5 \times 10^{-3}$  M in  $\text{H}_2\text{O}$ )

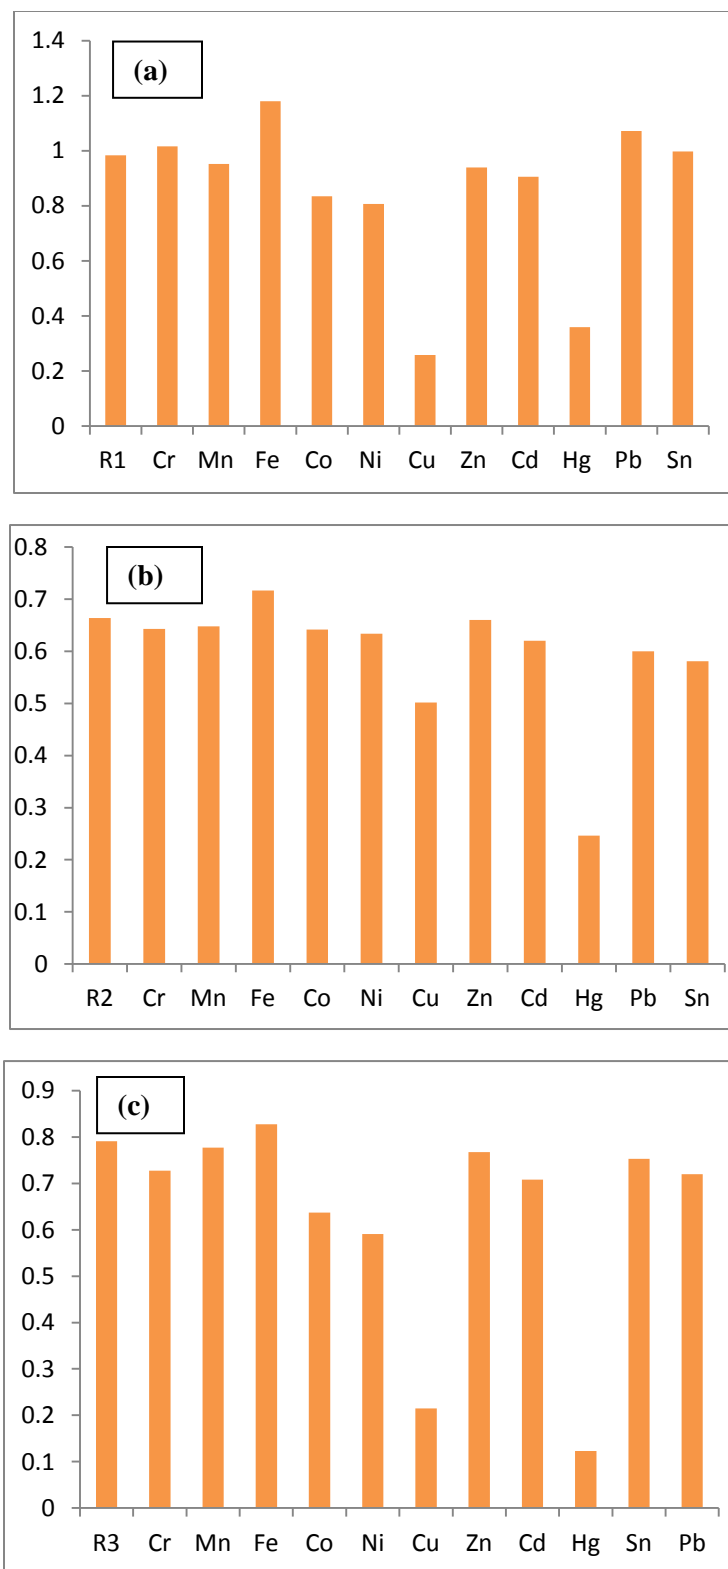

Fig. S2 UV-vis spectra of receptors (a) **1**, (b) **2**, (c) **3** ( $2.5 \times 10^{-5}$  M in DMSO) with the addition of 2 equiv. of all cations ( $1.5 \times 10^{-3}$  M in  $\text{H}_2\text{O}$ ). (Changes observed in the intramolecular charge transfer band at 325nm).

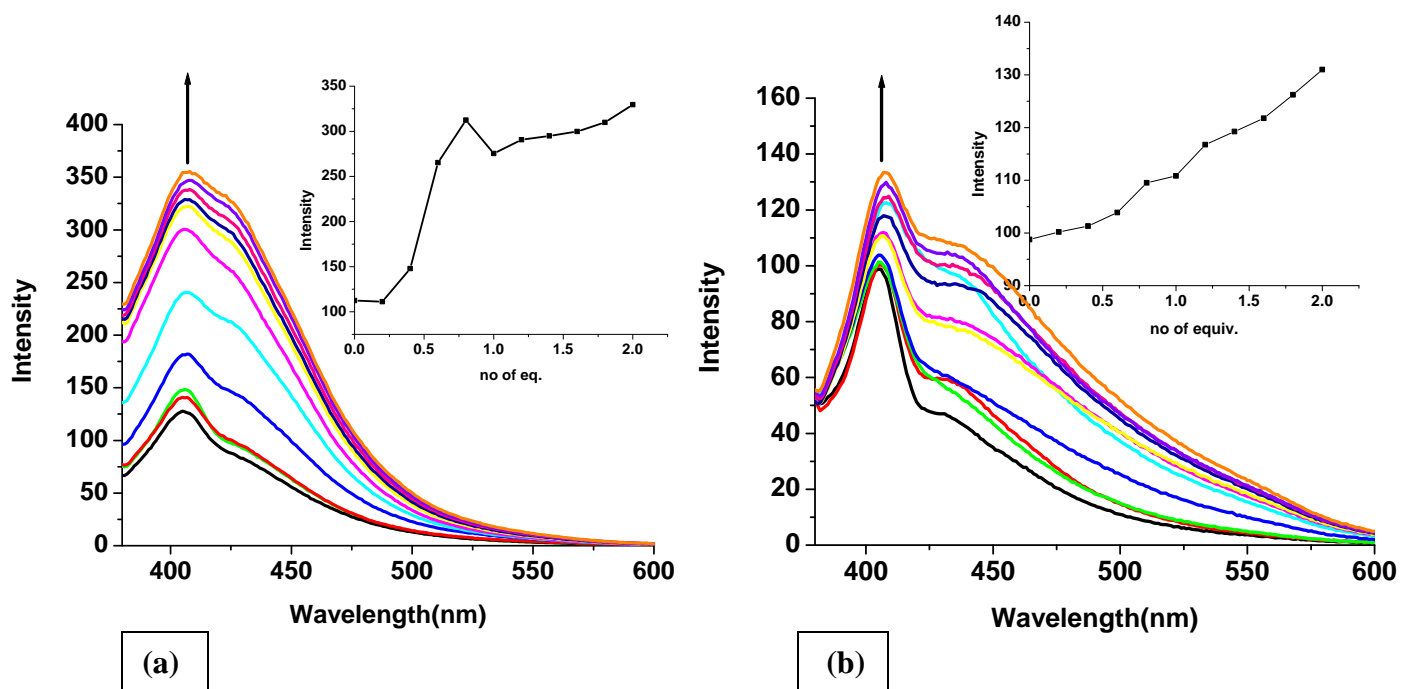

Fig. S3 Emission spectra of receptors (a) **2**, (b) **3** (2.5x10<sup>-5</sup> M in DMSO) with the addition of 0-2 equiv. of Cu<sup>2+</sup> ion (1.5x10<sup>-3</sup> M in H<sub>2</sub>O).

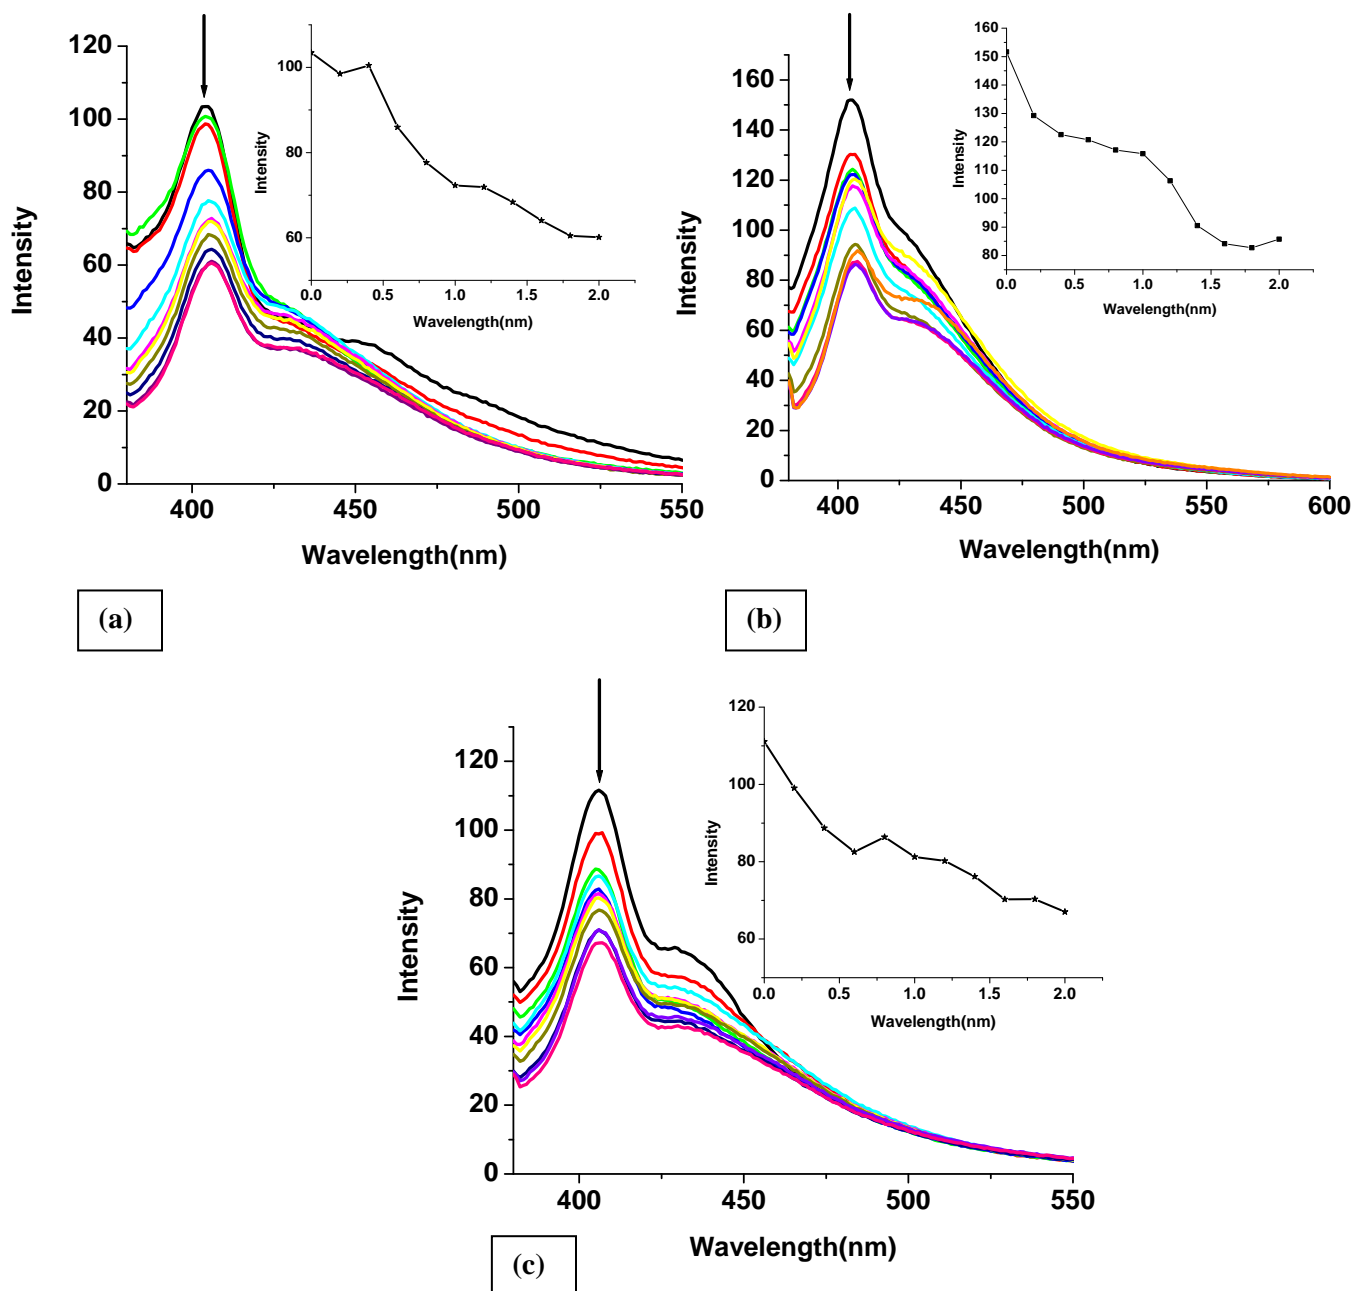

Fig. S4 Emission spectra of receptors (a) **1**, (b) **2**, (c) **3** ( $2.5 \times 10^{-5}$  M in DMSO) with the addition of 0- 2 equiv. of  $\text{Hg}^{2+}$  ion ( $1.5 \times 10^{-3}$  M in  $\text{H}_2\text{O}$ ).

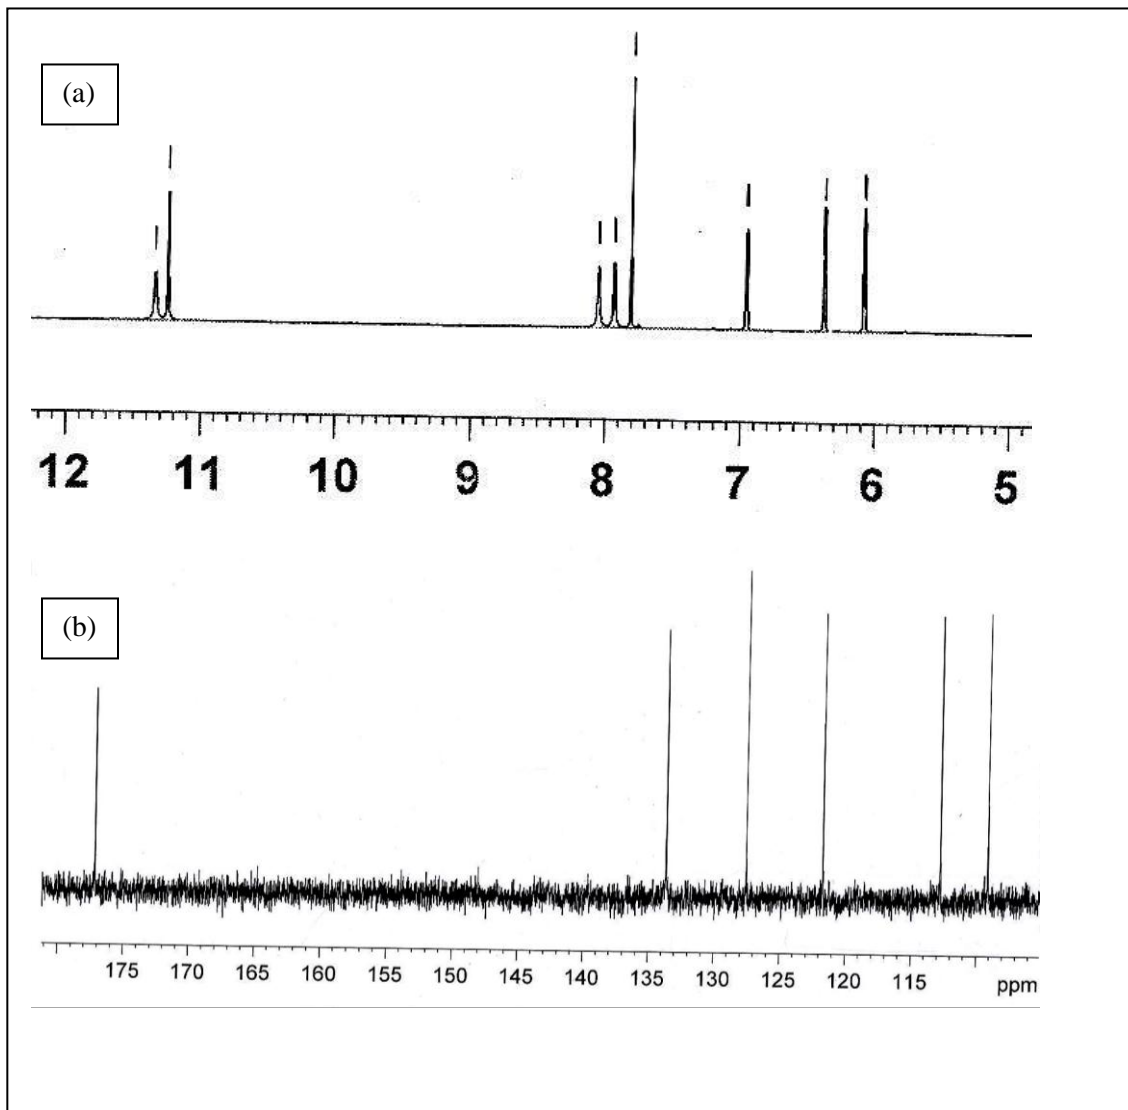

Fig. S5 (a)  $^1\text{H}$  and (b)  $^{13}\text{C}$  NMR for receptor **1** recorded on 300 MHz and 75 MHz spectrometer respectively using  $\text{DMSO-d}_6$ .

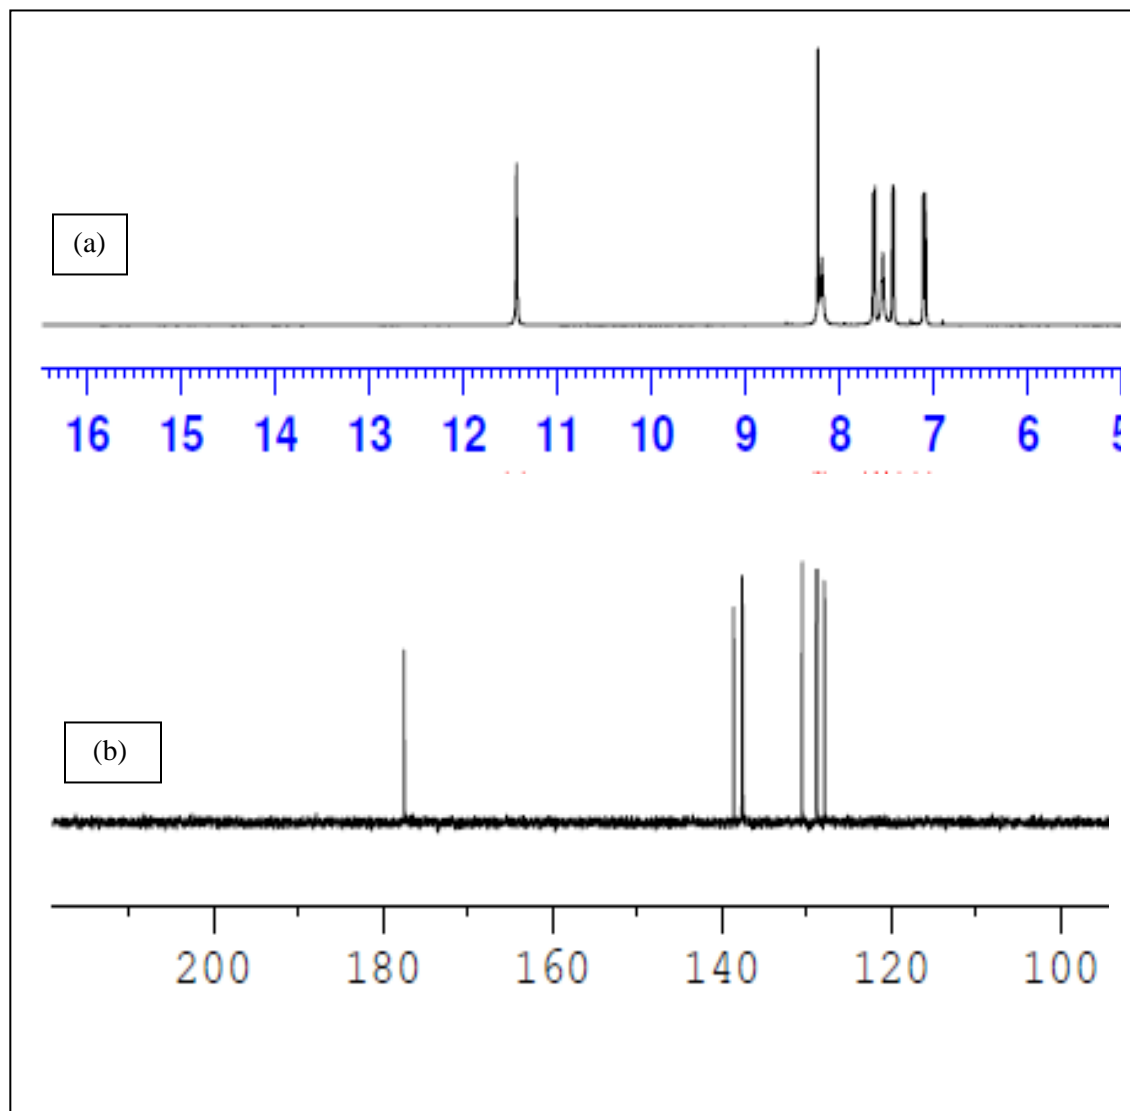

Fig. S6 (a)  $^1\text{H}$  and (b)  $^{13}\text{C}$  NMR for receptor **2** recorded on 300 MHz and 75 MHz spectrometer respectively using  $\text{DMSO-d}_6$ .

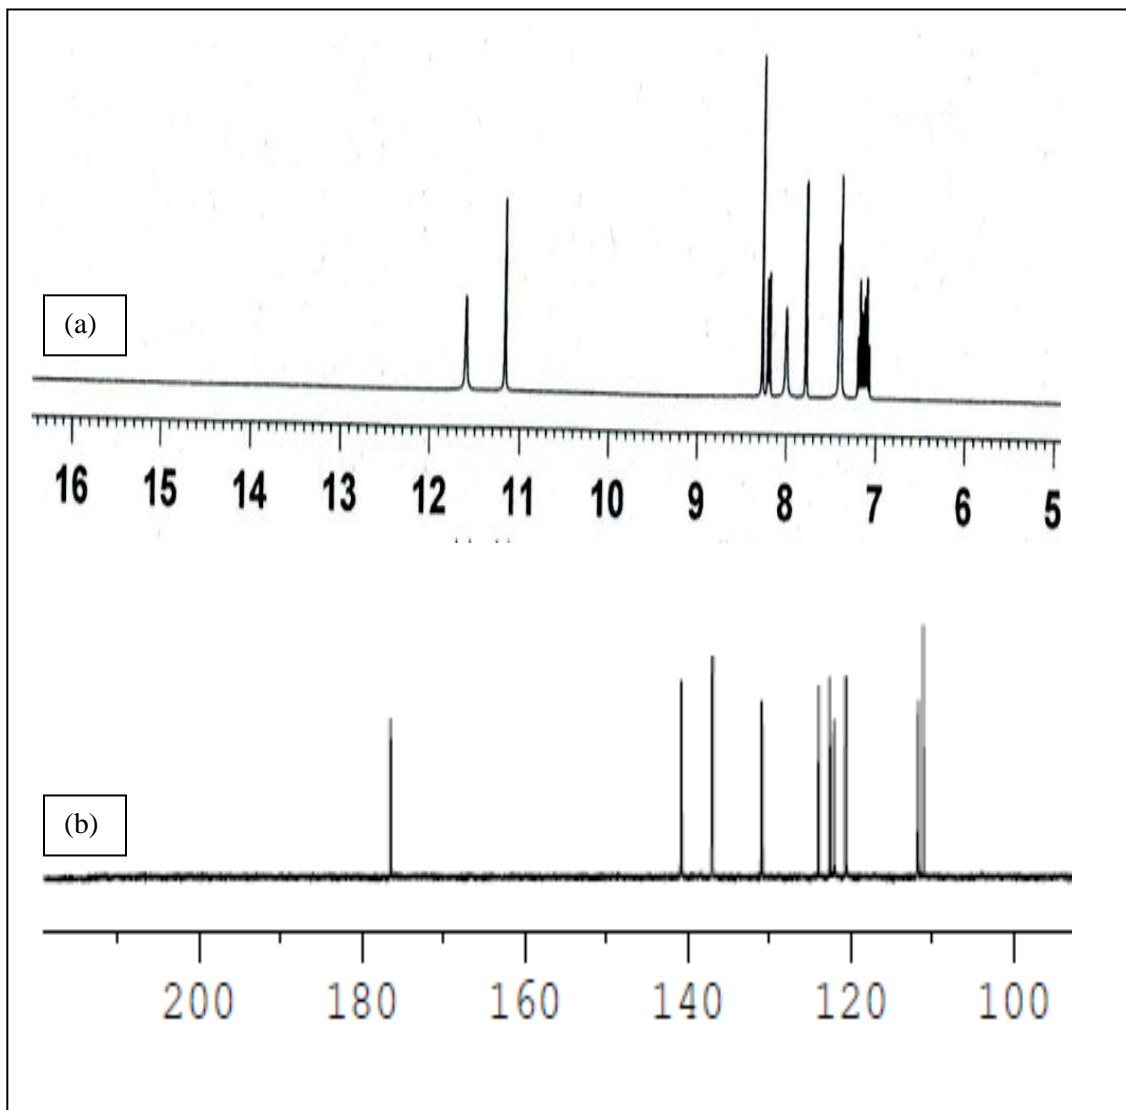

Fig. S7 (a)  $^1\text{H}$  and (b)  $^{13}\text{C}$  NMR for receptor **3** recorded on 300 MHz and 75 MHz spectrometer respectively using  $\text{DMSO-d}_6$ .



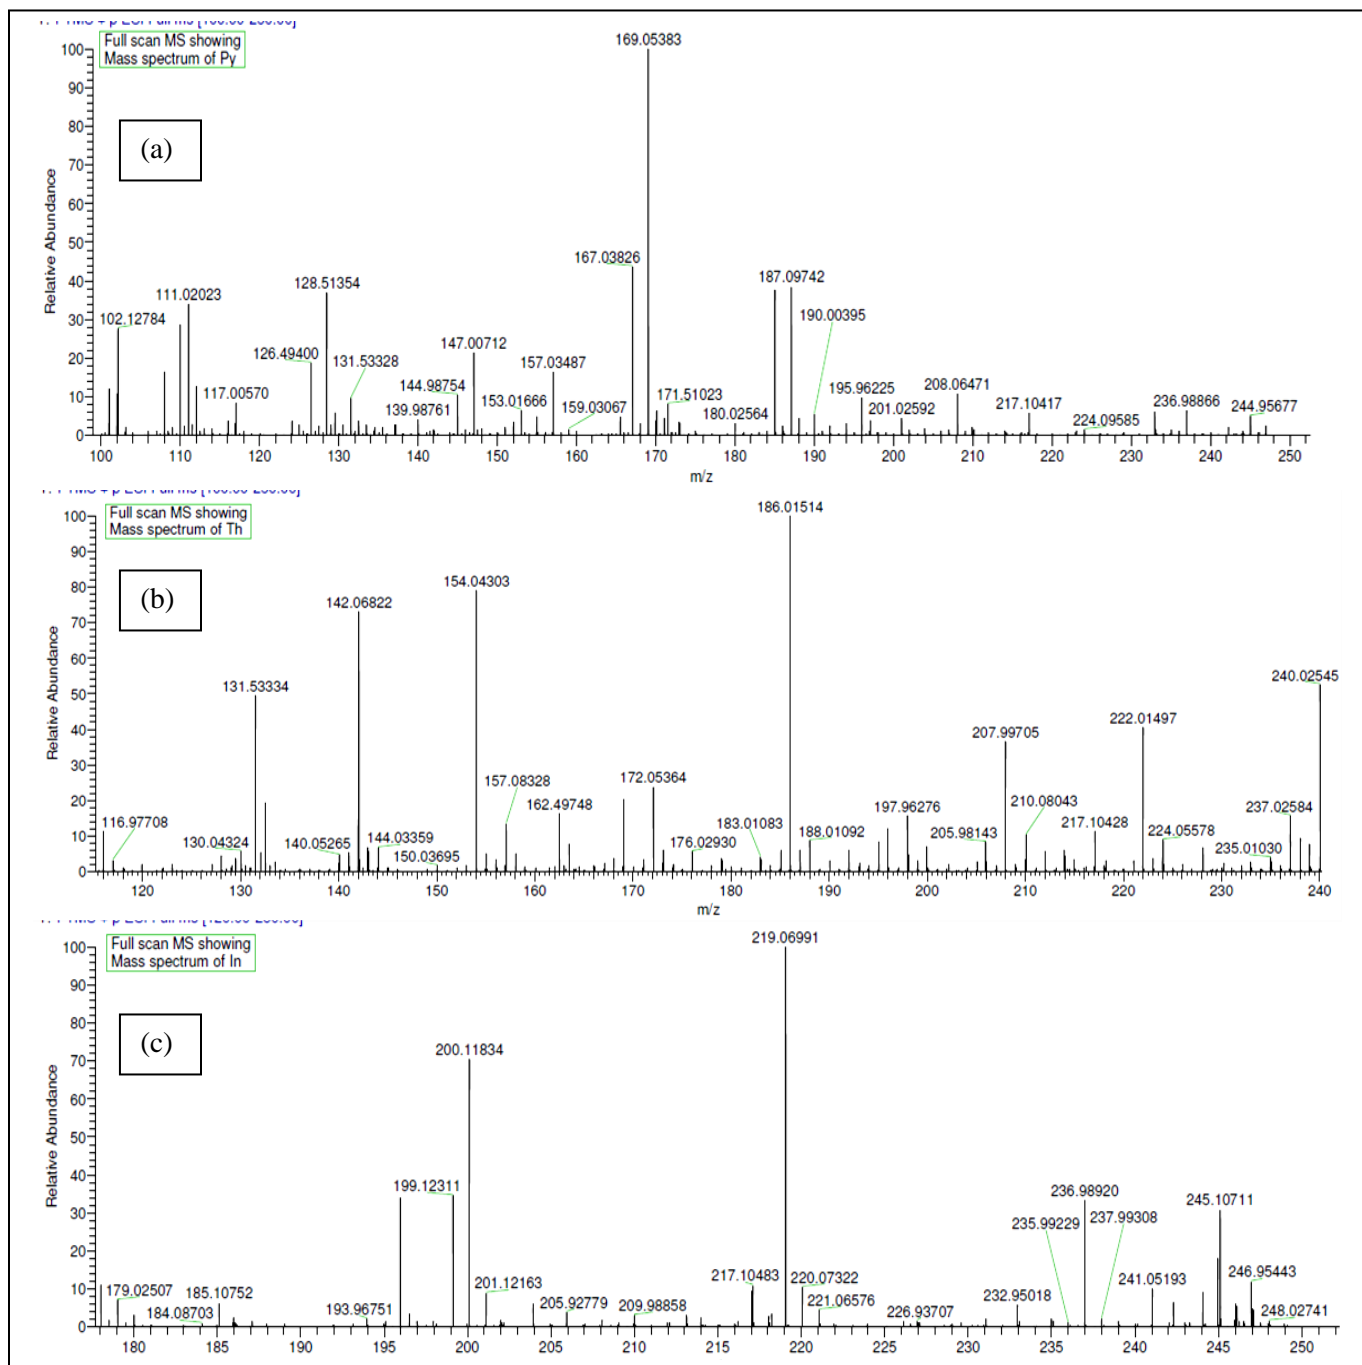

Fig. S8 HRMS data for receptors (a) **1**, (b) **2**, (c) **3** recorded on Orbitrap Q exactive mass spectrometer.
